# Supplementary material
Source: PubMed Central journal article supplement (PMC3659920)
Supplement: supp_2012.071944_2012.071944.ROVO_SUPPL.pdf [file supp_2012.071944_2012.071944.ROVO_SUPPL.pdf]

# Ongoing graft-versus-host disease is a risk factor for azoospermia after allogeneic hematopoietic stem cell transplantation: a survey of the Late Effects Working Party of the European Group for Blood and Marrow Transplantation

Alicia Rovó,<sup>1</sup> Mahmoud Aljurf,<sup>2</sup> Sandra Chiodi,<sup>3</sup> Simonetta Spinelli,<sup>3</sup> Nina Salooja,<sup>4</sup> Gülsan Sucak,<sup>5</sup> Ann Hunter,<sup>6</sup> Tan Swee Kim,<sup>7</sup> Gérard Socié,<sup>8</sup> Maria Teresa van Lint,<sup>3</sup> Jakob R. Passweg,<sup>9</sup> Mutlu Arat,<sup>10</sup> Manuela Badoglio,<sup>11</sup> and André Tichelli<sup>1</sup> on behalf of the Late Effects Working Party of the EBMT

<sup>1</sup>University Hospital of Basel, Basel, Switzerland; <sup>2</sup>King Faisal Specialist Hospital and Research Center, Riyadh, Saudi Arabia; <sup>3</sup>Ospedale San Martino, Genova, Italy; <sup>4</sup>Hammersmith Hospital, London, UK; <sup>5</sup>Gazi Universitesi Tip Fakültesi Hastanesi, Ankara, Turkey; <sup>6</sup>University Hospitals of Leicester NHS Trust, Leicester, UK; <sup>7</sup>Hospital Amfang Jalan Mewah Utara Pandan, Kuala Lumpur, Malaysia; <sup>8</sup>Paris VII Hospital Saint Louis, Paris, France; <sup>9</sup>Hôpitaux Universitaires de Genève, Switzerland; <sup>10</sup>Florence Nightingale Sisli Hospital, Istanbul, Turkey; and <sup>11</sup>EBMT Study Office, AP-HP, UPMC Univ Paris, France

©2013 Ferrata Storti Foundation. This is an open-access paper. *Haematologica* 2013;98. doi:10.3324/haematol.2012.071944

Online Supplementary Table S1. Analysis of first and last SFA in patients with more than one SFA after HSCT.

|                                                             | First SFA             | Last SFA      | P       |
|-------------------------------------------------------------|-----------------------|---------------|---------|
| N. of patients with at least 2 SFA after HSCT               | 58                    | 58            |         |
| Median time interval in months between HSCT and SFA (range) | 49 (1 - 269)          | 87 (28 – 275) | –       |
| Time interval between first and last SFA                    | 24 months (1.5 – 140) |               |         |
| Sperm analysis                                              |                       |               | <0.0001 |
| Normozoospermia (>20x10 <sup>6</sup> /mL)                   | 7 (12%)               | 9 (15%)       |         |
| Oligozoospermia (5-20x10 <sup>6</sup> /mL)                  | 1 (2%)                | 3 (5%)        |         |
| Severe oligozoospermia (<5x10 <sup>6</sup> /mL)             | 4 (7%)                | 6 (10%)       |         |
| Cryptospermia (Sperm presence only after centrifugation)    | 3 (5%)                | 4 (7%)        |         |
| Azoospermia (No sperm)                                      | 43 (74%)              | 36 (62%)      |         |

|                                                    |    | Patients without improvement between both SFAs | Patients with improvement between both SFAs | P     |
|----------------------------------------------------|----|------------------------------------------------|---------------------------------------------|-------|
| N. of patients                                     |    | 46                                             | 12                                          |       |
| Age > 25 years at HSCT                             | 12 | 7 (15%)                                        | 5 (42%)                                     | 0.102 |
| Time interval in months between first and last SFA |    | 19 (1.5-100)                                   | 31 (15-140)                                 | 0.015 |
| TBI                                                | 43 | 36 (80%)                                       | 7 (58%)                                     | 0.144 |
| Acute GVHD                                         | 33 | 24 (52%)                                       | 9 (82%)                                     | 0.097 |
| Chronic GVHD                                       | 33 | 24 (52%)                                       | 9 (82%)                                     | 0.97  |
| GVHD at time of last SFA                           | 20 | 14 (32)                                        | 6 (54%)                                     | 0.159 |
| Immunosuppression at time of last SFA              | 14 | 10 (23%)                                       | 4 (36%)                                     | 0.299 |

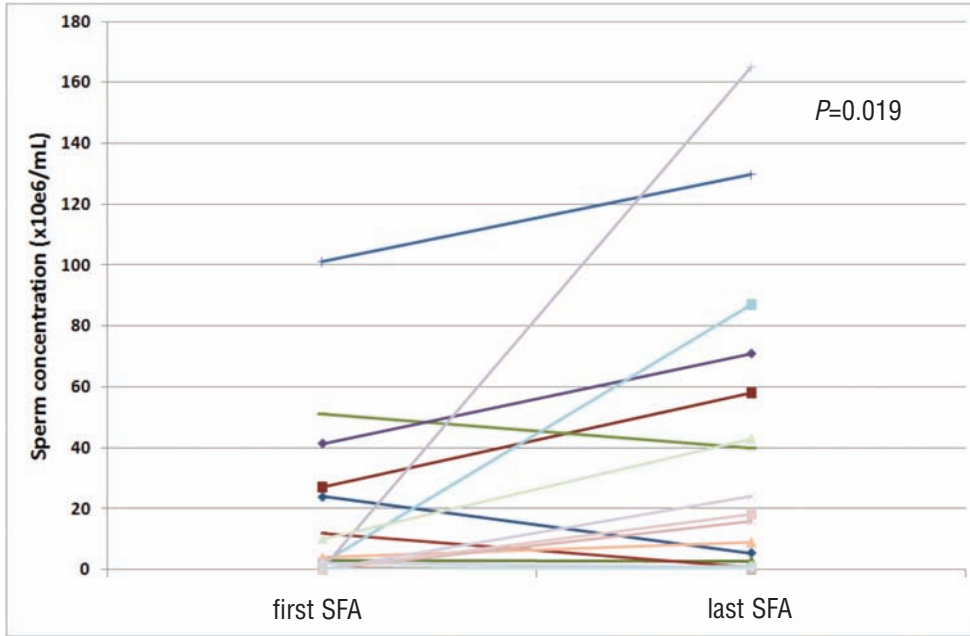

Online Supplementary Figure S1. Sperm concentration at first and last sperm analysis after HSCT from 58 patients with two or more sperm collections after HSCT. Sperm concentration is significantly lower at first compared to second sperm analysis ( $P=0.019$ ); 36 patients were azoospermic in first and last sperm analysis (SFA).
