# Supplementary material
Source: PubMed Central journal article supplement (PMC3659920)
Supplement: supp_2012.071944_2012_071944-Contributions.pdf [file supp_2012.071944_2012_071944-Contributions.pdf]

**Manuscript no. HAEMATOL/2012/071944 entitled "Ongoing graft-versus-host disease is a risk factor for azoospermia after allogeneic hematopoietic stem cell transplantation. A survey of the late effect working party of the European Group for Blood and Marrow Transplantation"**

**Authors: Alicia Rovó, Mahmoud Aljurf, Sandra Chiodi, Simonetta Spinelli, Nina Salooja, Gülsan Sucak, Ann Hunter, Tan Swee Kim, Gérard Socié, Maria Teresa van Lint, Jakob R Passweg, Mutlu Arat, Manuela Badoglio and André Tichelli on behalf of the Late Effects Working Party of the EBMT**

**Information about the contributions of each person named as having participated in the study**

**1) Guarantor(s), i.e., person(s) who is (are) responsible for the integrity of the work as a whole:**

- Alicia Rovó M.D. Email: RovoA@uhbs.ch

According to the International Committee of Medical Journal Editors (ICMJE) ([http://www.icmje.org/ethical\\_1author.html](http://www.icmje.org/ethical_1author.html)): "Authorship credit should be based on: 1) substantial contributions to conception and design, acquisition of data, or analysis and interpretation of data; 2) drafting the article or revising it critically for important intellectual content; and 3) final approval of the version to be published. Authors should meet conditions 1, 2, and 3 ..... Acquisition of funding, collection of data, or general supervision of the research group alone does not constitute authorship".

The guarantors of this manuscript confirm that all persons designated as authors qualify for authorship, and that each author has participated sufficiently in the work to take public responsibility for appropriate portions of the content.

**2) Authors who participated in the conception of the study:** Alicia Rovó, André Tichelli, Mahmoud Aljurf, Jakob R Passweg, Mutlu Arat

**3) Design & Methods. The following authors were responsible for specific investigations:**

- Alicia Rovó, Mahmoud Aljurf, Sandra Chiodi, Simonetta Spinelli, Nina Salooja, Gülsan Sucak, Ann Hunter, Tan Swee Kim, Gérard Socié, Maria Teresa van Lint, Jakob R Passweg, Mutlu Arat, Manuela Badoglio and André Tichelli were responsible for the design of the questionnaire to collect data, organize contact and contact EBMT centers

- Alicia Rovó, Mahmoud Aljurf, Sandra Chiodi, Simonetta Spinelli, Nina Salooja, Gülsan Sucak, Ann Hunter, Tan Swee Kim, Gérard Socié, Maria Teresa van Lint and Manuela Badoglio contributed to the data collection

**4) Results. The following authors were responsible for specific portions of the results, including figures and tables:**

- Alicia Rovó, André Tichelli, Mahmoud Aljurf, Jakob R Passweg, Mutlu Arat, Gérard Socié contributed to data analysis
- André Tichelli, Jakob R Passweg and Gerard Socie contributed to the statistical analysis of the study
- Alicia Rovó, André Tichelli, Mahmoud Aljurf, Jakob R Passweg, Mutlu Arat, Gérard Socié designed and agreed on Table 1 to 4, Figures 1 and 2 and Supplemental Online Material, table 1 and figure 1

**5) Writing the manuscript. The following authors were responsible for writing the manuscript:**

Alicia Rovó, André Tichelli, Mahmoud Aljurf. Sandra Chiodi, Simonetta Spinelli, Nina Salooja, Gülsan Sucak, Ann Hunter, Tan Swee Kim, Gérard Socié, Maria Teresa van Lint, Jakob R Passweg, Mutlu Arat, Manuela Badoglio revised and agreed with this manuscript

**6) Contributors Listed in Acknowledgments:** We thank Professor Alois Gratwohl for his continue motivation and support in this study. We would also thank Dr Zeynep Aki, Sylvie Lengay, Rosi Oneto, Jaana Vettenranta, Emanuela Marrocco, Ed Colcol, Maria Waeltermann, Gülsün Tezcan, Rik Lewin and Ann Devos for their valuable contribution to improve the data collection
